# Supplementary material for: Meta-dimensional data integration identifies critical pathways for susceptibility, tumorigenesis and progression of endometrial cancer
Source: PubMed Central journal article supplement (PMC5342415; doi:10.18632/oncotarget.10509), 2016-07-09
Supplement: oncotarget-07-55249-s001.pdf [file oncotarget-07-55249-s001.pdf]

## Meta-dimensional data integration identifies critical pathways for susceptibility, tumorigenesis and progression of endometrial cancer

### SUPPLEMENTARY FIGURES

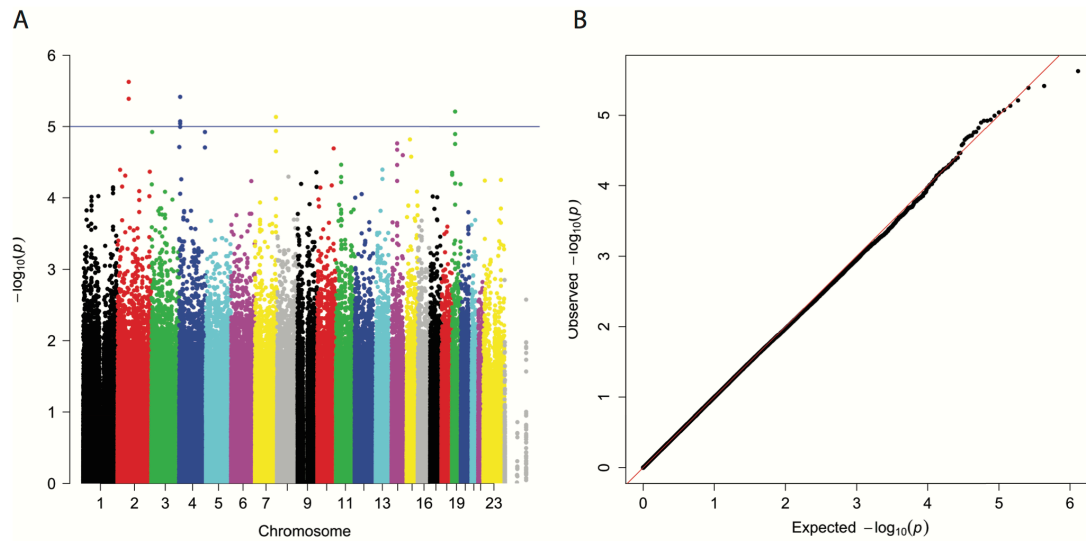

**Supplementary Figure S1: SNP-level GWAS results.** A. Manhattan plot, genomic coordinates are displayed along the X-axis, with the  $-\log_{10}(P)$  for each SNP displayed on the Y-axis B. QQ plot, expected distribution of  $-\log_{10}(P)$  (X-axis) compared to the observed  $-\log_{10}(P)$  (Y-axis).

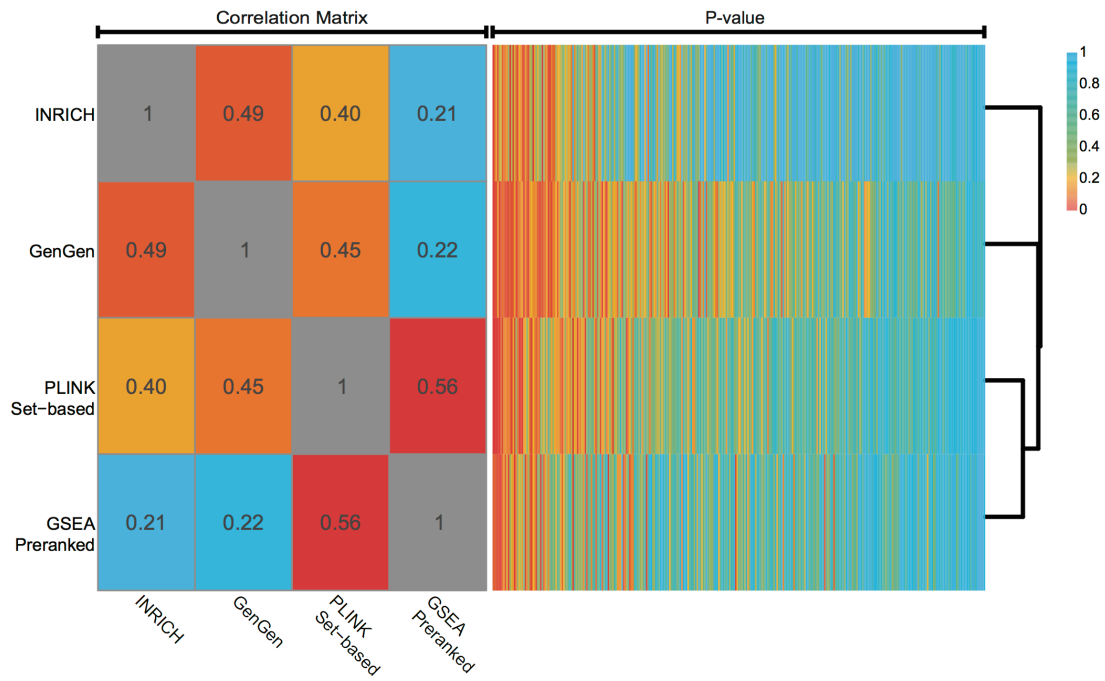

**Supplementary Figure S2: Correlation of pathway-level GWAS results across four methods.** (Left) Heat map refers to the correlation matrix from different methods. (Right) Heat map refers to the result (p-value) of each method.

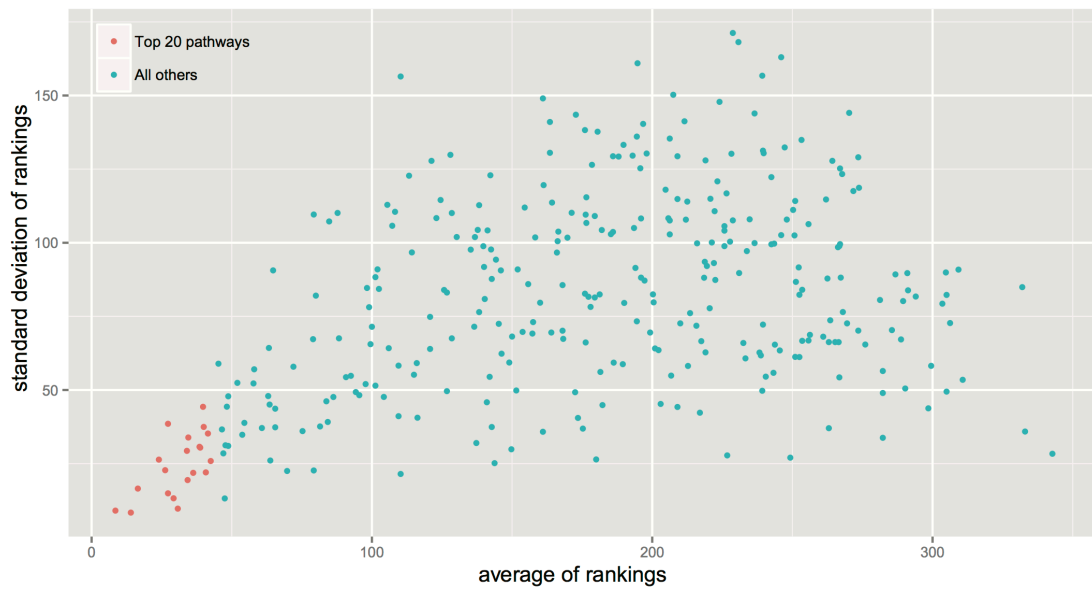

**Supplementary Figure S3: The Mean-SD plot of rankings from GWAS pathway analyses.** The scatter plot of pathway average rankings vs. standard deviation of rankings. The red points refer to the top 20 pathways we selected by Monte-Carlo simulations.

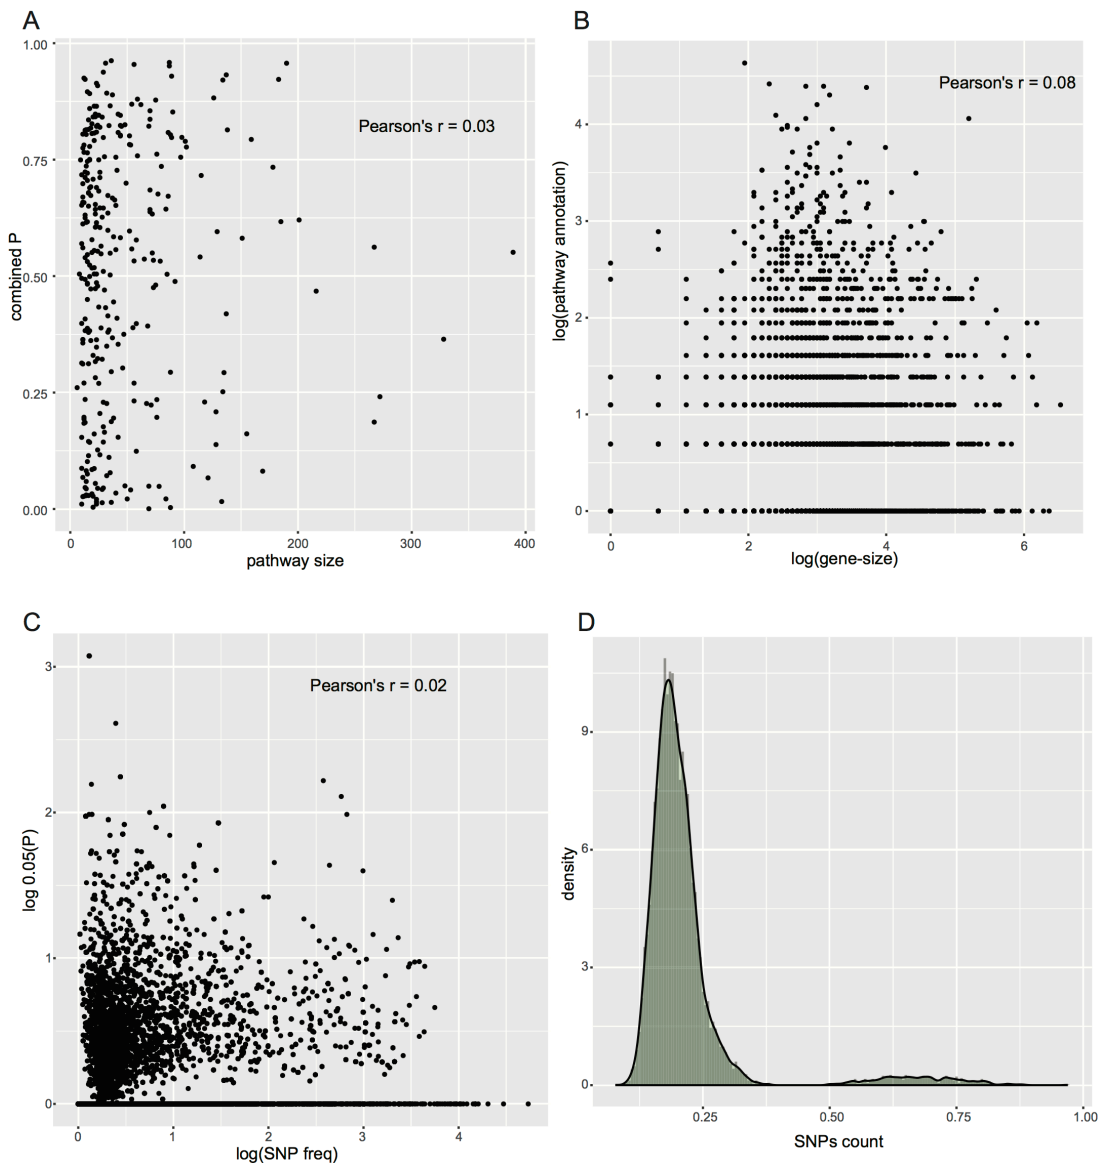

**Supplementary Figure S4: Results of the evaluation of potential confounding factors.** **A.** Pathway size vs. Pathway combined p-values **B.** Gene-size vs. Gene-Pathway annotation degree (log-scale) **C.** Gene-SNP frequencies vs. Gene-level p-values (log-scale) **D.** A bootstrap distribution of average SNP frequency in random 20 pathways.

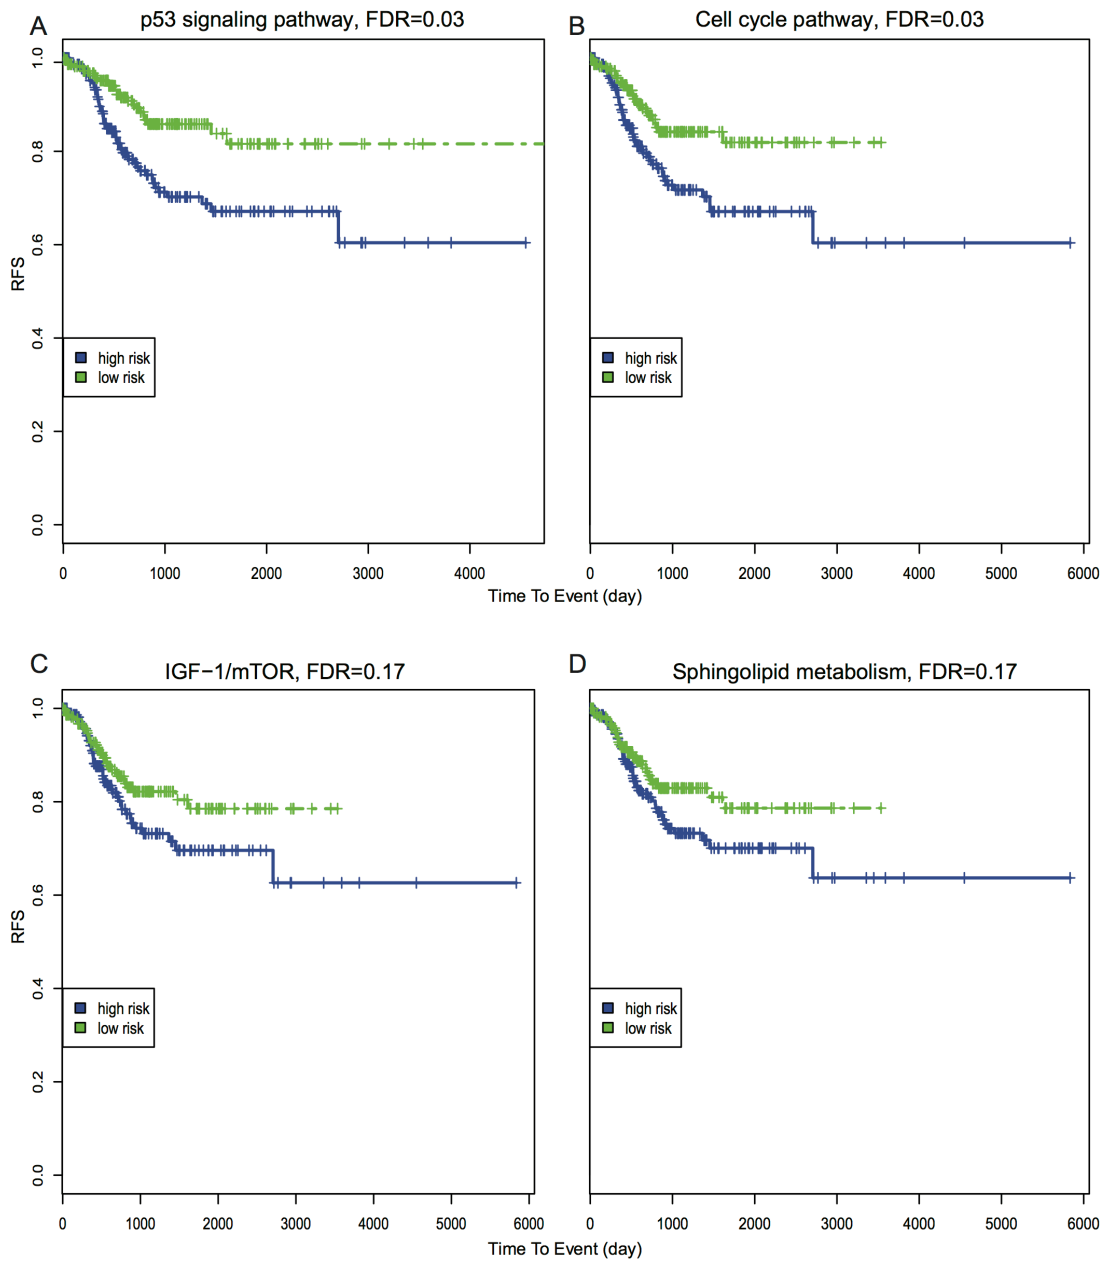

**Supplementary Figure S5: Kaplan-Meier survival curves with FDR. A.** p53 signaling pathway **B.** Cell cycle pathway **C.** IGF-1/mTOR **D.** Sphingolipid metabolism.

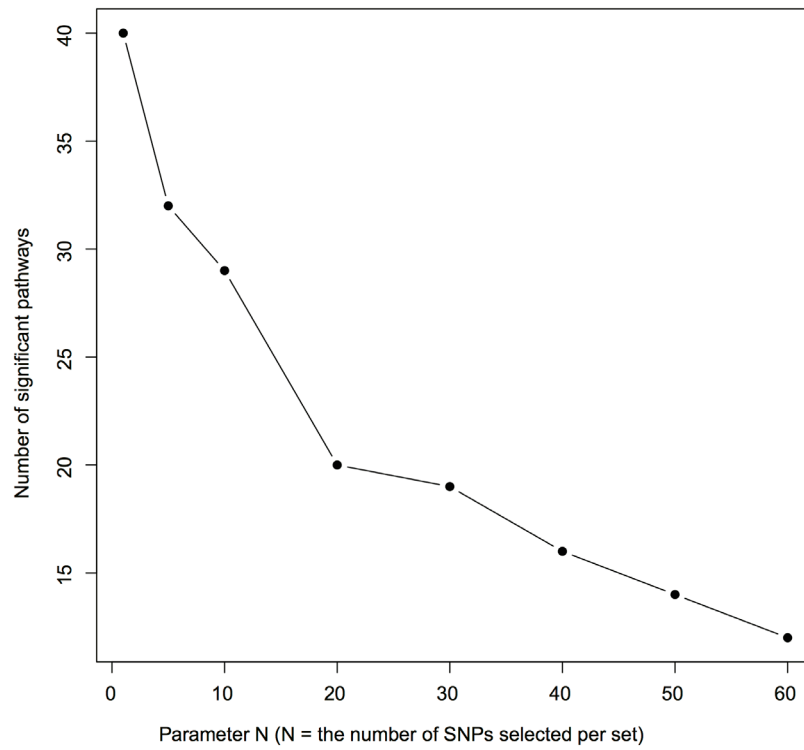

**Supplementary Figure S6: Parameter N in PLINK pathway-level analysis vs. the number of significant pathways in results.**

**Supplementary Data 1:**

See Supplementary File 1

**Supplementary Data 2:**

See Supplementary File 2

**Supplementary Data 3:**

See Supplementary File 3

**Supplementary Data 4:**

See Supplementary File 4
